# Supplementary material
Source: PubMed Central journal article supplement (PMC7724503)
Supplement: NIHMS1649103-supplement-Supplemental_table_figure.pdf [file NIHMS1649103-supplement-Supplemental_table_figure.pdf]

# Supporting Information

## Tautomerism of Warfarin: Combined Chemoinformatics, Quantum Chemical, and NMR Investigation

*Laura Guasch<sup>a</sup>, Megan L. Peach<sup>b</sup>, and Marc C. Nicklaus<sup>a\*</sup>*

<sup>a</sup> Chemical Biology Laboratory, Center for Cancer Research, National Cancer Institute, National Institutes of Health, Frederick, MD 21702, USA

<sup>b</sup> Basic Science Program, Chemical Biology Laboratory, Leidos Biomedical Research, Inc., Frederick National Laboratory for Cancer Research, Frederick, MD 21702, USA

\*E-mail: mn1@helix.nih.gov

### CONTENT

|                                                                                                                                                                    |                |
|--------------------------------------------------------------------------------------------------------------------------------------------------------------------|----------------|
| <b>SI1:</b> Calculated identifiers for all warfarin tautomers .....                                                                                                | <b>Pag. 2</b>  |
| <b>SI2:</b> Cartesian coordinates and absolute energies of the optimized geometry (B3LYP/6-311**G(d,p) of the twenty (S)-Warfarin tautomers at aqueous phase ..... | <b>Pag. 4</b>  |
| <b>SI3:</b> Determination of activation energies .....                                                                                                             | <b>Pag. 23</b> |

| Tautomer | Type      | SMILES                                                                 | InChIKey                             | FICuS                        | FICuu                        |
|----------|-----------|------------------------------------------------------------------------|--------------------------------------|------------------------------|------------------------------|
| T0R      | open form | <chem>C3=C([C@H](C1=C(OC2=C(C1=O)C=CC=C2)O)CC(=O)C)C=CC=C3</chem>      | InChIKey=QTXVAVXCMBYBJW-OAHLLOKOSA-N | F827AE327B01E945-FICuS-01-5A | D76B88C0354759F1-FICuu-01-77 |
| T0S      | open form | <chem>C3=C([C@H](C1=C(OC2=C(C1=O)C=CC=C2)O)CC(=O)C)C=CC=C3</chem>      | InChIKey=QTXVAVXCMBYBJW-HNNXBMFYSA-N | E1587768B6305F57-FICuS-01-48 | D76B88C0354759F1-FICuu-01-77 |
| T1R_R    | open form | <chem>C3=C([C@H]([C@@H]1C(C2=C(OC1=O)C=CC=C2)=O)CC(=O)C)C=CC=C3</chem> | InChIKey=FQEPJUOLUDFINX-NVXWUHKLSA-N | 380FDC3B980D4B88-FICuS-01-6F | D76B88C0354759F1-FICuu-01-77 |
| T1R_S    | open form | <chem>C3=C([C@H]([C@H]1C(C2=C(OC1=O)C=CC=C2)=O)CC(=O)C)C=CC=C3</chem>  | InChIKey=FQEPJUOLUDFINX-WBVHZDCISA-N | 8CBCEB9521DB22A3-FICuS-01-7D | D76B88C0354759F1-FICuu-01-77 |
| T1S_R    | open form | <chem>C3=C([C@H]([C@H]1C(C2=C(OC1=O)C=CC=C2)=O)CC(=O)C)C=CC=C3</chem>  | InChIKey=FQEPJUOLUDFINX-DOTOQJQBSA-N | D0B10E66C94D0FC3-FICuS-01-6F | D76B88C0354759F1-FICuu-01-77 |
| T1S_S    | open form | <chem>C3=C([C@H]([C@@H]1C(C2=C(OC1=O)C=CC=C2)=O)CC(=O)C)C=CC=C3</chem> | InChIKey=FQEPJUOLUDFINX-RDJZCZTQSA-N | 2092FDA4C9743762-FICuS-01-4C | D76B88C0354759F1-FICuu-01-77 |
| T2R_E    | open form | <chem>C3=C([C@H](C1=C(OC2=C(C1=O)C=CC=C2)O)C=C(O)C)C=CC=C3</chem>      | InChIKey=VWSXIGYSLWNCBN-AYJWMTRPSA-N | F827AE327B01E945-FICuS-01-5A | D76B88C0354759F1-FICuu-01-77 |
| T2R_Z    | open form | <chem>C3=C([C@H](C1=C(OC2=C(C1=O)C=CC=C2)O)C=C(O)C)C=CC=C3</chem>      | InChIKey=VWSXIGYSLWNCBN-QYMJWVLRSA-N | F827AE327B01E945-FICuS-01-5A | D76B88C0354759F1-FICuu-01-77 |
| T2S_E    | open form | <chem>C3=C([C@H](C1=C(OC2=C(C1=O)C=CC=C2)O)C=C(O)C)C=CC=C3</chem>      | InChIKey=VWSXIGYSLWNCBN-RUMSDORHSA-N | E1587768B6305F57-FICuS-01-48 | D76B88C0354759F1-FICuu-01-77 |
| T2S_Z    | open form | <chem>C3=C([C@H](C1=C(OC2=C(C1=O)C=CC=C2)O)C=C(O)C)C=CC=C3</chem>      | InChIKey=VWSXIGYSLWNCBN-SSCKCOOKSA-N | E1587768B6305F57-FICuS-01-48 | D76B88C0354759F1-FICuu-01-77 |
| T3R      | open form | <chem>C3=C([C@H](C1=C(OC2=C(C1=O)C=CC=C2)O)CC(O)=C)C=CC=C3</chem>      | InChIKey=GRAAPKVUSREWIL-OAHLLOKOSA-N | F827AE327B01E945-FICuS-01-5A | D76B88C0354759F1-FICuu-01-77 |
| T3S      | open form | <chem>C3=C([C@H](C1=C(OC2=C(C1=O)C=CC=C2)O)CC(O)=C)C=CC=C3</chem>      | InChIKey=GRAAPKVUSREWIL-HNNXBMFYSA-N | E1587768B6305F57-FICuS-01-48 | D76B88C0354759F1-FICuu-01-77 |
| T4R      | open form | <chem>C3=C([C@H](C1=C(C2=C(OC1=O)C=CC=C2)O)CC(=O)C)C=CC=C3</chem>      | InChIKey=PJVWKTQKMONHTI-OAHLLOKOSA-N | F827AE327B01E945-FICuS-01-5A | D76B88C0354759F1-FICuu-01-77 |
| T4S      | open form | <chem>C3=C([C@H](C1=C(C2=C(OC1=O)C=CC=C2)O)CC(=O)C)C=CC=C3</chem>      | InChIKey=PJVWKTQKMONHTI-HNNXBMFYSA-N | E1587768B6305F57-FICuS-01-48 | D76B88C0354759F1-FICuu-01-77 |
| T5R_RE   | open form | <chem>C3=C([C@H]([C@@H]1C(C2=C(OC1=O)C=CC=C2)=O)C=C(O)C)C=CC=C3</chem> | InChIKey=UCKRWKACBKRIKB-DEOBNHLSA-N  | 380FDC3B980D4B88-FICuS-01-6F | D76B88C0354759F1-FICuu-01-77 |
| T5R_RZ   | open form | <chem>C3=C([C@H]([C@H]1C(C2=C(OC1=O)C=CC=C2)=O)C=C(O)C)C=CC=C3</chem>  | InChIKey=UCKRWKACBKRIKB-MUEZYAOPSA-N | 380FDC3B980D4B88-FICuS-01-6F | D76B88C0354759F1-FICuu-01-77 |
| T5R_SE   | open form | <chem>C3=C([C@H]([C@H]1C(C2=C(OC1=O)C=CC=C2)=O)C=C(O)C)C=CC=C3</chem>  | InChIKey=UCKRWKACBKRIKB-GMZAYQHBSA-N | 8CBCEB9521DB22A3-FICuS-01-7D | D76B88C0354759F1-FICuu-01-77 |
| T5R_SZ   | open form | <chem>C3=C([C@H]([C@H]1C(C2=C(OC1=O)C=CC=C2)=O)C=C(O)C)C=CC=C3</chem>  | InChIKey=UCKRWKACBKRIKB-IHCBKXQLSA-N | 8CBCEB9521DB22A3-FICuS-01-7D | D76B88C0354759F1-FICuu-01-77 |
| T5S_RE   | open form | <chem>C3=C([C@H]([C@@H]1C(C2=C(OC1=O)C=CC=C2)=O)C=C(O)C)C=CC=C3</chem> | InChIKey=UCKRWKACBKRIKB-ZEERGYAVSA-N | D0B10E66C94D0FC3-FICuS-01-6F | D76B88C0354759F1-FICuu-01-77 |
| T5S_RZ   | open form | <chem>C3=C([C@H]([C@H]1C(C2=C(OC1=O)C=CC=C2)=O)C=C(O)C)C=CC=C3</chem>  | InChIKey=UCKRWKACBKRIKB-VTCQZUJXSA-N | D0B10E66C94D0FC3-FICuS-01-6F | D76B88C0354759F1-FICuu-01-77 |
| T5S_SE   | open form | <chem>C3=C([C@H]([C@H]1C(C2=C(OC1=O)C=CC=C2)=O)C=C(O)C)C=CC=C3</chem>  | InChIKey=UCKRWKACBKRIKB-ATOWBYMVSAN  | 2092FDA4C9743762-FICuS-01-4C | D76B88C0354759F1-FICuu-01-77 |
| T5S_SZ   | open form | <chem>C3=C([C@H]([C@H]1C(C2=C(OC1=O)C=CC=C2)=O)C=C(O)C)C=CC=C3</chem>  | InChIKey=UCKRWKACBKRIKB-PDOXMOPTSA-N | 2092FDA4C9743762-FICuS-01-4C | D76B88C0354759F1-FICuu-01-77 |
| T6R_R    | open form | <chem>C3=C([C@H]([C@@H]1C(C2=C(OC1=O)C=CC=C2)=O)CC(O)=C)C=CC=C3</chem> | InChIKey=NNLYDNMZCAHUOV-NVXWUHKLSA-N | 380FDC3B980D4B88-FICuS-01-6F | D76B88C0354759F1-FICuu-01-77 |
| T6R_S    | open form | <chem>C3=C([C@H]([C@H]1C(C2=C(OC1=O)C=CC=C2)=O)CC(O)=C)C=CC=C3</chem>  | InChIKey=NNLYDNMZCAHUOV-WBVHZDCISA-N | 8CBCEB9521DB22A3-FICuS-01-7D | D76B88C0354759F1-FICuu-01-77 |
| T6S_R    | open form | <chem>C3=C([C@H]([C@H]1C(C2=C(OC1=O)C=CC=C2)=O)CC(O)=C)C=CC=C3</chem>  | InChIKey=NNLYDNMZCAHUOV-DOTOQJQBSA-N | D0B10E66C94D0FC3-FICuS-01-6F | D76B88C0354759F1-FICuu-01-77 |

|        |            |                                                            |                                      |                              |                              |
|--------|------------|------------------------------------------------------------|--------------------------------------|------------------------------|------------------------------|
| T6S_S  | open form  | C3=C([C@@H]([C@H]1C(C2=C(OC1=O)C=CC=C2)=O)CC(O)=C)C=CC=C3  | InChIKey=NNLYDNMZCAHUOV-RDJZCZTQSA-N | 2092FDA4C9743762-FICuS-01-4C | D76B88C0354759F1-FICuu-01-77 |
| T7R_E  | open form  | C3=C([C@H](C1=C(C2=C(OC1=O)C=CC=C2)O)C=C(O)C)C=CC=C3       | InChIKey=FVSFCRPKSVCTBA-AYJWMTRPSA-N | F827AE327B01E945-FICuS-01-5A | D76B88C0354759F1-FICuu-01-77 |
| T7R_Z  | open form  | C3=C([C@H](C1=C(C2=C(OC1=O)C=CC=C2)O)C=C(O)C)C=CC=C3       | InChIKey=FVSFCRPKSVCTBA-QYMJWVLRSA-N | F827AE327B01E945-FICuS-01-5A | D76B88C0354759F1-FICuu-01-77 |
| T7S_E  | open form  | C3=C([C@@H](C1=C(C2=C(OC1=O)C=CC=C2)O)C=C(O)C)C=CC=C3      | InChIKey=FVSFCRPKSVCTBA-RUMSDORHSA-N | E1587768B6305F57-FICuS-01-48 | D76B88C0354759F1-FICuu-01-77 |
| T7S_Z  | open form  | C3=C([C@H](C1=C(C2=C(OC1=O)C=CC=C2)O)C=C(O)C)C=CC=C3       | InChIKey=FVSFCRPKSVCTBA-SSCKCOOKSA-N | E1587768B6305F57-FICuS-01-48 | D76B88C0354759F1-FICuu-01-77 |
| T8R    | open form  | C3=C([C@H](C1=C(C2=C(OC1=O)C=CC=C2)O)CC(O)=C)C=CC=C3       | InChIKey=BBOSKMPTDUUMKL-OAHLLOKOSA-N | F827AE327B01E945-FICuS-01-5A | D76B88C0354759F1-FICuu-01-77 |
| T8S    | open form  | C3=C([C@@H](C1=C(C2=C(OC1=O)C=CC=C2)O)CC(O)=C)C=CC=C3      | InChIKey=BBOSKMPTDUUMKL-HNNXBMFYSA-N | E1587768B6305F57-FICuS-01-48 | D76B88C0354759F1-FICuu-01-77 |
| T9R_R  | close form | C4=C([C@H]1C[C@@](OC2=C1C(C3=C(O2)C=CC=C3)=O)(O)C)C=CC=C4  | InChIKey=PIBBOXWKSPNJFI-AUUYWEPGSA-N | B2E54FE6EA5F22C5-FICuS-01-87 | 8F5519DD1E62B6B2-FICuu-01-8D |
| T9R_S  | close form | C4=C([C@H]1C[C@](OC2=C1C(C3=C(O2)C=CC=C3)=O)(O)C)C=CC=C4   | InChIKey=PIBBOXWKSPNJFI-KUHUBIRLSA-N | 868767C8AAA56BF2-FICuS-01-74 | 8F5519DD1E62B6B2-FICuu-01-8D |
| T9S_R  | close form | C4=C([C@@H]1C[C@@](OC2=C1C(C3=C(O2)C=CC=C3)=O)(O)C)C=CC=C4 | InChIKey=PIBBOXWKSPNJFI-IFXJQAMLSA-N | 3425AD28840DCB8E-FICuS-01-66 | 8F5519DD1E62B6B2-FICuu-01-8D |
| T9S_S  | close form | C4=C([C@H]1C[C@](OC2=C1C(C3=C(O2)C=CC=C3)=O)(O)C)C=CC=C4   | InChIKey=PIBBOXWKSPNJFI-LIRRHJRNSA-N | FB6B6F37AB71AFD4-FICuS-01-97 | 8F5519DD1E62B6B2-FICuu-01-8D |
| T10R_R | close form | C4=C([C@H]1C[C@@](OC2=C1C(OC3=C2C=CC=C3)=O)(O)C)C=CC=C4    | InChIKey=LSCYDZJASSKSMJ-AUUYWEPGSA-N | AEEF4BBFC9F12FC8-FICuS-01-BC | 09BB2FAADA1508A7-FICuu-01-9B |
| T10R_S | close form | C4=C([C@H]1C[C@](OC2=C1C(OC3=C2C=CC=C3)=O)(O)C)C=CC=C4     | InChIKey=LSCYDZJASSKSMJ-KUHUBIRLSA-N | 54A13A91AF246CC8-FICuS-01-61 | 09BB2FAADA1508A7-FICuu-01-9B |
| T10S_R | close form | C4=C([C@@H]1C[C@@](OC2=C1C(OC3=C2C=CC=C3)=O)(O)C)C=CC=C4   | InChIKey=LSCYDZJASSKSMJ-IFXJQAMLSA-N | 42F64A70CED6F76E-FICuS-01-7F | 09BB2FAADA1508A7-FICuu-01-9B |
| T10S_S | close form | C4=C([C@H]1C[C@](OC2=C1C(OC3=C2C=CC=C3)=O)(O)C)C=CC=C4     | InChIKey=LSCYDZJASSKSMJ-LIRRHJRNSA-N | 86BE245036F78F2B-FICuS-01-5F | 09BB2FAADA1508A7-FICuu-01-9B |

**Table SI2:** Cartesian coordinates and absolute energies of the optimized geometry (B3LYP/6-311\*\*G(d,p) of the twenty (S)-Warfarin tautomers at aqueous phase.

Tautomer **T0S**

Energy (B3LYP/6-311++G(d,p) = -1034.8618245 hartrees

|   |             |             |             |
|---|-------------|-------------|-------------|
| C | -1.86345174 | -1.72523652 | 1.38922039  |
| C | -2.08276736 | -0.90258533 | 0.27608597  |
| C | -1.45321928 | 0.49602673  | 0.27873832  |
| C | 0.07248427  | 0.41932332  | 0.24552661  |
| C | 0.82353505  | 1.08323432  | 1.17874712  |
| O | 2.15495214  | 0.95256827  | 1.32081170  |
| C | 2.85076263  | 0.12315206  | 0.47492869  |
| C | 2.21293700  | -0.51505508 | -0.58952281 |
| C | 0.75518843  | -0.34643854 | -0.78248964 |
| O | 0.17087957  | -0.84034307 | -1.75513862 |
| C | 2.98851004  | -1.32165893 | -1.43839197 |
| C | 4.34663789  | -1.47770068 | -1.21486778 |
| C | 4.95958383  | -0.82472729 | -0.13426819 |
| C | 4.21664863  | -0.01982729 | 0.71681747  |
| O | 0.36936436  | 1.94840654  | 2.07605344  |
| C | -2.02555030 | 1.45094586  | -0.78026262 |
| C | -1.79997472 | 2.91805977  | -0.48822593 |
| O | -1.34263877 | 3.31509938  | 0.57936730  |
| C | -2.17738461 | 3.89236728  | -1.56837532 |
| C | -2.88647526 | -1.39113798 | -0.75733988 |
| C | -3.45414481 | -2.66478546 | -0.68158986 |
| C | -3.22538604 | -3.47440123 | 0.42917296  |
| C | -2.42449640 | -2.99789876 | 1.46807370  |
| H | -1.24633668 | -1.36399601 | 2.20588417  |
| H | -1.72836902 | 0.91628420  | 1.24969806  |
| H | 2.49437145  | -1.81816000 | -2.26439907 |
| H | 4.93780352  | -2.10385687 | -1.87223122 |
| H | 6.02222162  | -0.94590798 | 0.03962737  |
| H | 4.66961313  | 0.49754659  | 1.55333400  |
| H | -0.40355136 | 2.43145732  | 1.68245619  |
| H | -1.64457493 | 1.22781239  | -1.78101079 |
| H | -3.11536026 | 1.33893433  | -0.84881996 |
| H | -1.39451775 | 3.87163036  | -2.33495879 |
| H | -3.11035666 | 3.60247683  | -2.05606881 |
| H | -2.25170907 | 4.90148082  | -1.16556681 |
| H | -3.06983716 | -0.79146696 | -1.63985188 |
| H | -4.07279167 | -3.02306440 | -1.49715369 |
| H | -3.66618451 | -4.46328185 | 0.48661609  |
| H | -2.24150244 | -3.61367520 | 2.34183130  |

Tautomer **T1S\_R**

Energy (B3LYP/6-311++G(d,p)) = -1034.85901688 hartrees

|   |             |             |             |
|---|-------------|-------------|-------------|
| C | 0.02916314  | 1.76573314  | -1.34827179 |
| C | 0.59832965  | 1.54514853  | -0.08692968 |
| C | 1.54691648  | 0.38337614  | 0.18579347  |
| C | 0.78731860  | -0.97527563 | 0.49694970  |
| C | 0.11942896  | -0.84951845 | 1.85489004  |
| O | -1.23895799 | -0.75705871 | 1.92441073  |
| C | -2.05981729 | -0.94252720 | 0.82445520  |
| C | -1.56564500 | -1.29452606 | -0.43508350 |
| C | -0.11736617 | -1.43338421 | -0.64231397 |
| O | 0.36859813  | -1.88044822 | -1.66868108 |
| C | -2.47938868 | -1.51181588 | -1.47936454 |
| C | -3.84031995 | -1.36384935 | -1.26766797 |
| C | -4.30846568 | -1.00293879 | 0.00205554  |
| C | -3.42335527 | -0.79578926 | 1.05414190  |
| O | 0.73858730  | -0.79184763 | 2.88489142  |
| C | 2.60584402  | 0.20785531  | -0.92478115 |
| C | 3.78877561  | -0.68617790 | -0.57205311 |
| O | 4.13252567  | -1.58187174 | -1.32326383 |
| C | 4.54418000  | -0.40033277 | 0.70517471  |
| C | 0.28386385  | 2.43260276  | 0.95001241  |
| C | -0.58196597 | 3.50534006  | 0.73865014  |
| C | -1.14534980 | 3.71093309  | -0.51941988 |
| C | -0.83463963 | 2.83869305  | -1.56244464 |
| H | 0.26085701  | 1.10704294  | -2.17709243 |
| H | 2.07038379  | 0.61541309  | 1.11514375  |
| H | 1.55423157  | -1.74451153 | 0.62116591  |
| H | -2.09073388 | -1.78892877 | -2.45149122 |
| H | -4.53953900 | -1.52546415 | -2.07856755 |
| H | -5.37198311 | -0.88673580 | 0.17386236  |
| H | -3.77144210 | -0.52875812 | 2.04380589  |
| H | 2.16709004  | -0.17077713 | -1.84658524 |
| H | 3.02215062  | 1.20068789  | -1.13345630 |
| H | 3.96741981  | -0.75555772 | 1.56563899  |
| H | 4.69795041  | 0.67299288  | 0.84235048  |
| H | 5.50166578  | -0.91953748 | 0.69278497  |
| H | 0.72610198  | 2.29012386  | 1.93062175  |
| H | -0.80844726 | 4.18195771  | 1.55492468  |
| H | -1.81514766 | 4.54648437  | -0.68793082 |
| H | -1.26162397 | 2.99409891  | -2.54679039 |

Tautomer **T1S\_S**

Energy (B3LYP/6-311++G(d,p)) = -1034.85956927 hartrees

|   |             |             |             |
|---|-------------|-------------|-------------|
| C | 0.00210025  | 2.01526152  | -1.41583205 |
| C | -0.62999899 | 1.49931443  | -0.27758491 |
| C | -1.48283308 | 0.24174777  | -0.39804446 |
| C | -0.72483615 | -1.06914949 | 0.07108334  |
| C | -0.27786454 | -0.98788840 | 1.51647559  |
| O | 1.04931695  | -0.81626625 | 1.78952606  |
| C | 2.03604166  | -0.93062044 | 0.82620425  |
| C | 1.75774428  | -1.24681545 | -0.50730668 |
| C | 0.36632802  | -1.40895768 | -0.94361561 |
| O | 0.05106859  | -1.76679960 | -2.06648449 |
| C | 2.82946676  | -1.38708201 | -1.40480204 |
| C | 4.13432920  | -1.20524212 | -0.97773057 |
| C | 4.38557616  | -0.88292377 | 0.36212724  |
| C | 3.34139651  | -0.74805993 | 1.27008123  |
| O | -1.03496504 | -1.04282086 | 2.45011973  |
| C | -2.86075322 | 0.39872855  | 0.28441582  |
| C | -3.88665691 | -0.67241690 | -0.06530088 |
| O | -4.45826211 | -1.29420579 | 0.81309034  |
| C | -4.19680887 | -0.90984073 | -1.52533074 |
| C | -0.46103130 | 2.17103558  | 0.94072403  |
| C | 0.32582417  | 3.31934835  | 1.01799686  |
| C | 0.95342468  | 3.82024561  | -0.12224087 |
| C | 0.78768124  | 3.16496340  | -1.34130092 |
| H | -0.12698835 | 1.51830790  | -2.37155585 |
| H | -1.65130100 | 0.07156237  | -1.46304629 |
| H | -1.44960085 | -1.88678186 | 0.03208231  |
| H | 2.60600496  | -1.63287844 | -2.43556815 |
| H | 4.95649204  | -1.30957357 | -1.67467607 |
| H | 5.40445814  | -0.73925700 | 0.70180636  |
| H | 3.52206037  | -0.50987915 | 2.31050491  |
| H | -2.77218676 | 0.43482383  | 1.36947165  |
| H | -3.27958690 | 1.35471835  | -0.05082750 |
| H | -5.12195519 | -1.47699679 | -1.62020621 |
| H | -4.27288485 | 0.03336050  | -2.07189556 |
| H | -3.38780576 | -1.48550484 | -1.98748636 |
| H | -0.94767356 | 1.80933392  | 1.83908151  |
| H | 0.44282320  | 3.82518442  | 1.96976524  |
| H | 1.56180053  | 4.71541932  | -0.06142273 |
| H | 1.26429769  | 3.54901132  | -2.23615205 |

Tautomer **T2S\_E**

Energy (B3LYP/6-311++G(d,p)) = -1034.83868495 hartrees

|   |            |             |             |
|---|------------|-------------|-------------|
| C | 2.91951413 | -1.60768818 | -0.87141924 |
| C | 1.95019202 | -1.05458377 | -0.02714767 |

|   |             |             |             |
|---|-------------|-------------|-------------|
| C | 1.31210864  | 0.29004348  | -0.39488160 |
| C | -0.17761245 | 0.33806331  | -0.05482449 |
| C | -0.71638479 | 1.07045689  | 0.96762301  |
| O | -2.02121044 | 1.09869172  | 1.28635502  |
| C | -2.91900511 | 0.35332823  | 0.56130362  |
| C | -2.50203125 | -0.40566745 | -0.53196708 |
| C | -1.07212010 | -0.42888415 | -0.90579326 |
| O | -0.67239384 | -1.07114864 | -1.88668925 |
| C | -3.47140915 | -1.13655201 | -1.23849775 |
| C | -4.80108624 | -1.09898978 | -0.85259779 |
| C | -5.18975288 | -0.32606839 | 0.25252446  |
| C | -4.25198317 | 0.40525136  | 0.96676290  |
| O | -0.06456004 | 1.86850707  | 1.80640493  |
| C | 2.18253673  | 1.41476251  | 0.16500302  |
| C | 2.37082279  | 2.61932878  | -0.40934062 |
| O | 3.25014085  | 3.53874303  | 0.09037688  |
| C | 1.68184238  | 3.15302611  | -1.62348898 |
| C | 1.63591202  | -1.72487543 | 1.15851387  |
| C | 2.27583737  | -2.91925169 | 1.49405639  |
| C | 3.23922466  | -3.46253725 | 0.64499547  |
| C | 3.55891033  | -2.80169069 | -0.54186786 |
| H | 3.17286637  | -1.10105727 | -1.79734900 |
| H | 1.34752229  | 0.34526172  | -1.48572962 |
| H | -3.14901749 | -1.72744547 | -2.08677930 |
| H | -5.54307120 | -1.66590862 | -1.40186243 |
| H | -6.23011848 | -0.29670062 | 0.55395103  |
| H | -4.52925821 | 1.00953602  | 1.82146009  |
| H | 0.84703280  | 1.98995759  | 1.45557237  |
| H | 2.79735961  | 1.16387608  | 1.02790456  |
| H | 3.72068441  | 3.17420943  | 0.85190074  |
| H | 0.98363628  | 2.43501378  | -2.04809816 |
| H | 1.13278961  | 4.06413958  | -1.36834849 |
| H | 2.42348477  | 3.42042637  | -2.38170611 |
| H | 0.88287101  | -1.31952029 | 1.82555499  |
| H | 2.01798507  | -3.42532713 | 2.41793867  |
| H | 3.73369291  | -4.39224062 | 0.90312445  |
| H | 4.30263224  | -3.21739748 | -1.21285286 |

Tautomer **T2S\_Z**

Energy (B3LYP/6-311++G(d,p)) = -1034.84056762 hartrees

|   |             |             |             |
|---|-------------|-------------|-------------|
| C | 2.97996681  | -1.57195241 | -0.89382615 |
| C | 2.00527051  | -1.03131673 | -0.04782495 |
| C | 1.32602134  | 0.28695029  | -0.43339028 |
| C | -0.15994937 | 0.31090289  | -0.07541186 |
| C | -0.67971720 | 0.98038163  | 0.99979555  |

|   |             |             |             |
|---|-------------|-------------|-------------|
| O | -1.97702983 | 0.98288511  | 1.34389751  |
| C | -2.88547856 | 0.27193111  | 0.59633081  |
| C | -2.48574495 | -0.43257773 | -0.53930769 |
| C | -1.06292539 | -0.43325308 | -0.93826589 |
| O | -0.67341625 | -1.03840248 | -1.94608715 |
| C | -3.46511059 | -1.13258382 | -1.26298246 |
| C | -4.78810444 | -1.11706986 | -0.85337105 |
| C | -5.15937015 | -0.39868616 | 0.29363277  |
| C | -4.21118791 | 0.30035306  | 1.02632440  |
| O | -0.01207654 | 1.72638258  | 1.87221378  |
| C | 2.15899167  | 1.46024256  | 0.07806998  |
| C | 2.16440177  | 2.69647467  | -0.45943912 |
| O | 1.34794502  | 3.08575616  | -1.47910188 |
| C | 3.05599998  | 3.81377571  | -0.02047848 |
| C | 1.71874062  | -1.69091982 | 1.15056582  |
| C | 2.39314007  | -2.86256436 | 1.49785930  |
| C | 3.36217872  | -3.39373154 | 0.64760846  |
| C | 3.65334617  | -2.74376052 | -0.55227633 |
| H | 3.21069908  | -1.07375942 | -1.83016655 |
| H | 1.34379253  | 0.30828147  | -1.52984321 |
| H | -3.15573109 | -1.68182186 | -2.14347495 |
| H | -5.53819303 | -1.65913659 | -1.41647159 |
| H | -6.19449580 | -0.38659253 | 0.61365695  |
| H | -4.47512665 | 0.86176081  | 1.91380804  |
| H | 0.89131396  | 1.88247896  | 1.51206401  |
| H | 2.89295103  | 1.25547638  | 0.84909119  |
| H | 0.77444665  | 2.36185739  | -1.76274061 |
| H | 3.68480315  | 4.13771899  | -0.85523009 |
| H | 2.46008972  | 4.67518059  | 0.29457334  |
| H | 3.69637297  | 3.50348381  | 0.80407399  |
| H | 0.96191694  | -1.29576177 | 1.81919587  |
| H | 2.15734347  | -3.36073606 | 2.43179443  |
| H | 3.88282405  | -4.30632482 | 0.91503041  |
| H | 4.40079917  | -3.15065173 | -1.22441619 |

### Tautomer T3S

Energy (B3LYP/6-311++G(d,p)) = -1034.83438085 hartrees

|   |             |             |             |
|---|-------------|-------------|-------------|
| C | 2.41676682  | -1.25870104 | -1.33560894 |
| C | 2.43567509  | -0.26658912 | -0.34079103 |
| C | 1.28865754  | 0.74922498  | -0.29980694 |
| C | -0.05649901 | 0.08488752  | -0.02435531 |
| C | -0.25716654 | -0.73371048 | 1.05095942  |
| O | -1.42744369 | -1.29630726 | 1.38568480  |
| C | -2.53916869 | -1.06112250 | 0.61219018  |
| C | -2.45712525 | -0.28523888 | -0.54420453 |



|   |             |             |             |
|---|-------------|-------------|-------------|
| C | -1.16622265 | 0.32247487  | -0.93465382 |
| O | -1.05662776 | 0.98667569  | -1.97314379 |
| C | -3.62674011 | -0.09927231 | -1.29953132 |
| C | -4.82233635 | -0.67246970 | -0.89902661 |
| C | -4.87281698 | -1.44650200 | 0.27050907  |
| C | -3.73199978 | -1.64654731 | 1.03377801  |
| O | 0.65391370  | -1.11255541 | 1.94809892  |
| C | 1.55609588  | 1.95043935  | 0.64993716  |
| C | 0.60556077  | 3.09829092  | 0.46057776  |
| O | 0.84550757  | 3.74722224  | -0.72558619 |
| C | -0.33946094 | 3.46567873  | 1.33105528  |
| C | 3.49861497  | -0.26862571 | 0.57158664  |
| C | 4.50791546  | -1.23637175 | 0.49650606  |
| C | 4.47416885  | -2.20980541 | -0.49509132 |
| C | 3.42231707  | -2.21481012 | -1.41616372 |
| H | 1.60385334  | -1.27485800 | -2.05388449 |
| H | 1.19451908  | 1.15739000  | -1.30876022 |
| H | -3.56546761 | 0.50369502  | -2.19688451 |
| H | -5.72030525 | -0.52404388 | -1.48655847 |
| H | -5.80832786 | -1.89485802 | 0.58330466  |
| H | -3.74658454 | -2.24237792 | 1.93777203  |
| H | 1.55240850  | -0.94746797 | 1.61179675  |
| H | 2.56704790  | 2.32299077  | 0.45642924  |
| H | 1.51715461  | 1.63761194  | 1.69488556  |
| H | 0.20168141  | 4.45637053  | -0.84846064 |
| H | -0.47522648 | 2.91485604  | 2.25151363  |
| H | -0.99077493 | 4.31304639  | 1.14619325  |
| H | 3.56457822  | 0.48883986  | 1.34348179  |
| H | 5.31919795  | -1.21656863 | 1.21530367  |
| H | 5.25704274  | -2.95697137 | -0.55575756 |
| H | 3.38898759  | -2.96531725 | -2.19800089 |

#### Tautomer T4S

Energy (B3LYP/6-311++G(d,p)) = -1034.86734476 hartrees

|   |             |             |             |
|---|-------------|-------------|-------------|
| C | -3.16565740 | -0.88939427 | -0.82558246 |
| C | -2.31144175 | -0.52875965 | 0.22339262  |
| C | -1.39829590 | 0.70302755  | 0.18692983  |
| C | 0.08176098  | 0.34345922  | 0.28027539  |
| C | 0.69278791  | -0.64004390 | -0.45530876 |
| C | 2.11709841  | -0.87903301 | -0.35341103 |
| C | 2.84679254  | -0.08206132 | 0.53565743  |
| O | 2.23264136  | 0.88127354  | 1.28423629  |
| C | 0.87756247  | 1.14154507  | 1.19184854  |
| O | 0.45501318  | 2.03877973  | 1.89894932  |
| C | 4.22199107  | -0.24121467 | 0.69629463  |

|   |             |             |             |
|---|-------------|-------------|-------------|
| C | 4.87604086  | -1.21419487 | -0.04723058 |
| C | 4.16578273  | -2.02483487 | -0.94400515 |
| C | 2.79847777  | -1.86046192 | -1.09567434 |
| O | 0.05594916  | -1.44574956 | -1.32104296 |
| C | -1.68767374 | 1.65168723  | -1.01355952 |
| C | -0.96534176 | 2.98572460  | -0.89351090 |
| O | 0.10031384  | 3.17316801  | -1.45461569 |
| C | -1.64403434 | 4.06694824  | -0.08934535 |
| C | -2.29916891 | -1.33145339 | 1.37625906  |
| C | -3.11120821 | -2.45534934 | 1.47540988  |
| C | -3.95573455 | -2.80826626 | 0.41924935  |
| C | -3.97931331 | -2.02385093 | -0.72842246 |
| H | -3.21579023 | -0.29159135 | -1.72763889 |
| H | -1.61805711 | 1.26431234  | 1.09779981  |
| H | 4.75214251  | 0.39402964  | 1.39469085  |
| H | 5.94520267  | -1.34513649 | 0.07016582  |
| H | 4.68620665  | -2.78123951 | -1.51854109 |
| H | 2.23998222  | -2.48097215 | -1.78380075 |
| H | -0.90866645 | -1.36755289 | -1.23117722 |
| H | -1.37965249 | 1.19100226  | -1.95461423 |
| H | -2.76391466 | 1.84015843  | -1.05100831 |
| H | -2.48030591 | 4.46009646  | -0.67855746 |
| H | -2.06497101 | 3.67100822  | 0.83744001  |
| H | -0.94907512 | 4.87716199  | 0.12735386  |
| H | -1.64772624 | -1.06730380 | 2.20259667  |
| H | -3.08896727 | -3.05619606 | 2.37756410  |
| H | -4.58815173 | -3.68514060 | 0.49585794  |
| H | -4.63214533 | -2.28325143 | -1.55394379 |

Tautomer **T5S\_RE**

Energy (B3LYP/6-311++G(d,p)) = -1034.84263653 hartrees

|   |             |             |             |
|---|-------------|-------------|-------------|
| C | -2.99375353 | -0.02454982 | -1.12591229 |
| C | -2.45604030 | 0.05965620  | 0.16151965  |
| C | -1.00303254 | 0.45310782  | 0.42653325  |
| C | -0.13960861 | -0.81574947 | 0.87070559  |
| C | 0.03297514  | -1.79736181 | -0.26420676 |
| O | 1.20969270  | -1.78052729 | -0.96910790 |
| C | 2.34435478  | -1.13878768 | -0.50510754 |
| C | 2.37693096  | -0.44415669 | 0.70877930  |
| C | 1.15232533  | -0.32019196 | 1.50969012  |
| O | 1.12299592  | 0.18698788  | 2.61931683  |
| C | 3.58882854  | 0.13176783  | 1.12383189  |
| C | 4.72550608  | 0.02507336  | 0.33929050  |
| C | 4.66456934  | -0.66836672 | -0.87621701 |
| C | 3.47855490  | -1.25599130 | -1.30203406 |

|   |             |             |             |
|---|-------------|-------------|-------------|
| O | -0.81473030 | -2.57226127 | -0.61994890 |
| C | -0.34376109 | 1.22125264  | -0.68800612 |
| C | 0.03015745  | 2.50851605  | -0.64780355 |
| O | 0.62480774  | 3.12352754  | -1.72399911 |
| C | -0.11283610 | 3.48327235  | 0.47846032  |
| C | -3.29275396 | -0.21162422 | 1.25259853  |
| C | -4.62696529 | -0.56383845 | 1.06413039  |
| C | -5.15094365 | -0.65174790 | -0.22670067 |
| C | -4.32996422 | -0.37949725 | -1.31911890 |
| H | -2.37603829 | 0.19346039  | -1.98839186 |
| H | -1.00512349 | 1.06328917  | 1.33056015  |
| H | -0.71461400 | -1.32913421 | 1.64246921  |
| H | 3.60619673  | 0.66602430  | 2.06577409  |
| H | 5.65580162  | 0.47621250  | 0.66128080  |
| H | 5.55021398  | -0.75498191 | -1.49454195 |
| H | 3.42102004  | -1.80583389 | -2.23283529 |
| H | -0.16296799 | 0.68286138  | -1.61638628 |
| H | 0.71783986  | 2.49800766  | -2.45426954 |
| H | -0.70772333 | 4.34035405  | 0.14934554  |
| H | 0.87116041  | 3.86214307  | 0.76999755  |
| H | -0.59095772 | 3.04718621  | 1.35256397  |
| H | -2.89909875 | -0.13972019 | 2.26203372  |
| H | -5.25788490 | -0.76320969 | 1.92318162  |
| H | -6.18949010 | -0.92393922 | -0.37730520 |
| H | -4.72772177 | -0.43923233 | -2.32615964 |

Tautomer **T5S\_RZ**

Energy (B3LYP/6-311++G(d,p)) = -1034.84513288 hartrees

|   |             |             |             |
|---|-------------|-------------|-------------|
| C | 2.92155793  | -0.83959348 | 0.82961473  |
| C | 1.90730940  | -0.65336910 | -0.11851560 |
| C | 0.87328705  | 0.45842666  | 0.02511726  |
| C | -0.05648751 | 0.20332380  | 1.30201704  |
| C | -1.01174551 | 1.36097285  | 1.46435828  |
| O | -2.14477252 | 1.35056050  | 0.68887095  |
| C | -2.60852705 | 0.18679626  | 0.09661882  |
| C | -2.00631480 | -1.05648654 | 0.32079175  |
| C | -0.78435050 | -1.12440545 | 1.14303202  |
| O | -0.35027866 | -2.15568525 | 1.62447978  |
| C | -2.58347567 | -2.19986799 | -0.25172735 |
| C | -3.71894507 | -2.09491412 | -1.04042786 |
| C | -4.29958156 | -0.83915925 | -1.25464945 |
| C | -3.75390987 | 0.30564323  | -0.68271293 |
| O | -0.82954546 | 2.30762272  | 2.18113509  |
| C | 1.52529427  | 1.81529870  | 0.07946619  |
| C | 1.31989697  | 2.79169460  | -0.81397090 |

|   |             |             |             |
|---|-------------|-------------|-------------|
| O | 0.43766595  | 2.59048558  | -1.85026376 |
| C | 1.99519844  | 4.12879096  | -0.78043198 |
| C | 1.87307952  | -1.49499419 | -1.23470118 |
| C | 2.82802360  | -2.49890130 | -1.40424534 |
| C | 3.83165419  | -2.67615818 | -0.45407515 |
| C | 3.87441774  | -1.84209279 | 0.66472576  |
| H | 2.97521270  | -0.20202040 | 1.70561872  |
| H | 0.22611459  | 0.42495506  | -0.85247703 |
| H | 0.57217590  | 0.16862279  | 2.19076617  |
| H | -2.11275484 | -3.15889540 | -0.07248575 |
| H | -4.15434744 | -2.97856892 | -1.49018691 |
| H | -5.18836833 | -0.75210626 | -1.86837835 |
| H | -4.20424447 | 1.27985365  | -0.82496880 |
| H | 2.22520271  | 2.01038634  | 0.88253515  |
| H | 0.39100127  | 3.37890077  | -2.40272893 |
| H | 2.67269049  | 4.20199271  | 0.06969241  |
| H | 2.57127598  | 4.29423117  | -1.69747682 |
| H | 1.25603460  | 4.93363202  | -0.70431313 |
| H | 1.09573732  | -1.36414240 | -1.98028886 |
| H | 2.78515380  | -3.13957254 | -2.27801209 |
| H | 4.57460820  | -3.45518170 | -0.58235636 |
| H | 4.65166364  | -1.97198329 | 1.40957947  |

Tautomer **T5S\_SE**

Energy (B3LYP/6-311++G(d,p)) = -1034.8423851 hartrees

|   |             |             |             |
|---|-------------|-------------|-------------|
| C | -3.33855279 | -0.14121400 | 0.96843164  |
| C | -2.31184923 | -0.09766964 | 0.01577014  |
| C | -1.04488045 | 0.69410247  | 0.33596955  |
| C | -0.09905450 | -0.13333103 | 1.33142571  |
| C | 0.94212479  | 0.82395562  | 1.87060298  |
| O | 2.20440646  | 0.78772397  | 1.34971560  |
| C | 2.62244470  | -0.20704101 | 0.48182838  |
| C | 1.82047641  | -1.30437075 | 0.15199436  |
| C | 0.45787363  | -1.39855646 | 0.70080566  |
| O | -0.21387866 | -2.41567911 | 0.64818075  |
| C | 2.34805887  | -2.29539739 | -0.69083880 |
| C | 3.63213327  | -2.17798303 | -1.19885809 |
| C | 4.41341751  | -1.06747480 | -0.85645373 |
| C | 3.91665803  | -0.08116030 | -0.01118239 |
| O | 0.70673503  | 1.65409187  | 2.70967610  |
| C | -0.30076983 | 1.20602971  | -0.86786758 |
| C | -0.13782340 | 2.49390160  | -1.20665256 |
| O | 0.55274541  | 2.86096704  | -2.33712476 |
| C | -0.63717725 | 3.71493493  | -0.50014926 |
| C | -2.50118659 | -0.76748300 | -1.19697588 |

|   |             |             |             |
|---|-------------|-------------|-------------|
| C | -3.68113196 | -1.46959092 | -1.44726182 |
| C | -4.69307420 | -1.51005944 | -0.48995030 |
| C | -4.51839330 | -0.83947769 | 0.72153698  |
| H | -3.21764521 | 0.38274273  | 1.91180391  |
| H | -1.35763001 | 1.54086040  | 0.94765688  |
| H | -0.72348038 | -0.42541381 | 2.17655908  |
| H | 1.72314508  | -3.14462324 | -0.93889058 |
| H | 4.03053418  | -2.94036410 | -1.85671077 |
| H | 5.41924917  | -0.97212948 | -1.24807704 |
| H | 4.51460660  | 0.77548185  | 0.27287542  |
| H | 0.13857318  | 0.46268585  | -1.52860109 |
| H | 0.86806104  | 2.07558744  | -2.80300019 |
| H | -1.29222220 | 4.28311737  | -1.16720019 |
| H | -1.18884564 | 3.48047782  | 0.40736775  |
| H | 0.20429695  | 4.36341023  | -0.23941278 |
| H | -1.73333644 | -0.74246630 | -1.96031495 |
| H | -3.80818011 | -1.98198930 | -2.39447262 |
| H | -5.61080700 | -2.05257763 | -0.68690826 |
| H | -5.30214712 | -0.85431918 | 1.47069411  |

Tautomer **T5S\_SZ**

Energy (B3LYP/6-311++G(d,p)) = -1034.84504702 hartrees

|   |             |             |             |
|---|-------------|-------------|-------------|
| C | 3.17996922  | -0.05827489 | 0.80401033  |
| C | 2.17435161  | -0.12228906 | -0.16906897 |
| C | 0.78665806  | 0.46395172  | 0.07310474  |
| C | 0.02323145  | -0.31491616 | 1.24162187  |
| C | -0.01953442 | -1.79032693 | 0.92120891  |
| O | -0.99525477 | -2.21041088 | 0.05058107  |
| C | -2.12570218 | -1.44781360 | -0.19621033 |
| C | -2.37943716 | -0.24841714 | 0.47885807  |
| C | -1.36887873 | 0.27606516  | 1.41471516  |
| O | -1.59454579 | 1.14544454  | 2.23720888  |
| C | -3.58734528 | 0.42174760  | 0.23407526  |
| C | -4.50106977 | -0.08515695 | -0.67716100 |
| C | -4.21977644 | -1.28166562 | -1.34751872 |
| C | -3.03690204 | -1.97282606 | -1.10600476 |
| O | 0.76222833  | -2.60809465 | 1.32552374  |
| C | 0.85631532  | 1.93961120  | 0.36631266  |
| C | 0.33951916  | 2.89257960  | -0.41981023 |
| O | -0.33433565 | 2.53643918  | -1.56535426 |
| C | 0.44255802  | 4.36330547  | -0.15240178 |
| C | 2.47156747  | -0.71537573 | -1.40022959 |
| C | 3.74265450  | -1.23160361 | -1.65783459 |
| C | 4.73495451  | -1.16424374 | -0.68204396 |
| C | 4.44814766  | -0.57571038 | 0.55126245  |

|   |             |             |             |
|---|-------------|-------------|-------------|
| H | 2.97857736  | 0.39748214  | 1.76743315  |
| H | 0.20470347  | 0.32241596  | -0.83867616 |
| H | 0.58191117  | -0.19036178 | 2.16846020  |
| H | -3.77909542 | 1.34736776  | 0.76322420  |
| H | -5.42687356 | 0.44183266  | -0.87179146 |
| H | -4.93114405 | -1.68258831 | -2.05985337 |
| H | -2.81656218 | -2.90946744 | -1.60227628 |
| H | 1.38562259  | 2.25596030  | 1.25670440  |
| H | -0.66296060 | 3.32344721  | -2.01405104 |
| H | 0.95972046  | 4.87091745  | -0.97409822 |
| H | -0.55330210 | 4.81087171  | -0.06162729 |
| H | 0.99084773  | 4.55402719  | 0.76961187  |
| H | 1.70531052  | -0.77206058 | -2.16647496 |
| H | 3.95388037  | -1.68499443 | -2.61992558 |
| H | 5.72293622  | -1.56504426 | -0.87842699 |
| H | 5.21400533  | -0.51867622 | 1.31677907  |

**Tautomer T6S\_R**

Energy (B3LYP/6-311++G(d,p)) = -1034.84076089 hartrees

|   |             |             |             |
|---|-------------|-------------|-------------|
| C | -2.58009409 | 0.88672558  | 1.07953210  |
| C | -1.65875405 | 0.61858124  | 0.05935369  |
| C | -0.73829703 | -0.59162490 | 0.11651405  |
| C | 0.28567013  | -0.46840312 | 1.32215813  |
| C | 1.19756707  | -1.67532759 | 1.35823105  |
| O | 2.26775475  | -1.67655861 | 0.50223700  |
| C | 2.73949739  | -0.50635567 | -0.07456412 |
| C | 2.22428660  | 0.75004649  | 0.26261610  |
| C | 1.07881761  | 0.82936850  | 1.18693482  |
| O | 0.74999039  | 1.84389115  | 1.77281970  |
| C | 2.81146036  | 1.89367830  | -0.29857211 |
| C | 3.86905562  | 1.77598401  | -1.18776779 |
| C | 4.36090162  | 0.50711732  | -1.51552233 |
| C | 3.80590882  | -0.63951828 | -0.95578851 |
| O | 1.02284105  | -2.64657088 | 2.04460500  |
| C | -1.52883541 | -1.92440688 | 0.19350320  |
| C | -2.40917523 | -2.15499238 | -1.00312336 |
| O | -1.67014986 | -2.18193533 | -2.16036613 |
| C | -3.73138574 | -2.33786537 | -0.96023224 |
| C | -1.60712025 | 1.48320751  | -1.03822154 |
| C | -2.45406774 | 2.58967262  | -1.11890923 |
| C | -3.36570620 | 2.84729648  | -0.09728973 |
| C | -3.42578800 | 1.99080829  | 1.00339351  |
| H | -2.64401557 | 0.23549487  | 1.94460159  |
| H | -0.15458699 | -0.60844589 | -0.80641247 |
| H | -0.26805476 | -0.45089678 | 2.26038840  |

|   |             |             |             |
|---|-------------|-------------|-------------|
| H | 2.40937454  | 2.86350541  | -0.03189005 |
| H | 4.31155265  | 2.66047012  | -1.62879548 |
| H | 5.18815811  | 0.41039685  | -2.20863610 |
| H | 4.19074218  | -1.62522624 | -1.18454113 |
| H | -0.82524574 | -2.75988458 | 0.25333829  |
| H | -2.13939189 | -1.95329244 | 1.09696147  |
| H | -2.25125597 | -2.32364085 | -2.91854894 |
| H | -4.25721308 | -2.29966085 | -0.01635331 |
| H | -4.31062108 | -2.53019683 | -1.85682804 |
| H | -0.90127402 | 1.29017679  | -1.83914649 |
| H | -2.39953992 | 3.24701866  | -1.97947995 |
| H | -4.02418876 | 3.70652250  | -0.15622694 |
| H | -4.13157906 | 2.18309561  | 1.80373033  |

### Tautomer T6S\_S

Energy (B3LYP/6-311++G(d,p)) = -1034.83845687 hartrees

|   |             |             |             |
|---|-------------|-------------|-------------|
| C | -2.21182471 | -1.13488240 | -0.84409066 |
| C | -2.11234973 | -0.27250513 | 0.25347080  |
| C | -0.91561463 | 0.63825198  | 0.48265406  |
| C | 0.20032152  | -0.08206868 | 1.36110448  |
| C | 1.15854118  | 0.97206258  | 1.88142444  |
| O | 2.38546694  | 1.09888632  | 1.29082159  |
| C | 2.86059514  | 0.19181578  | 0.35639013  |
| C | 2.16824574  | -0.97692841 | 0.02506918  |
| C | 0.86750075  | -1.25404363 | 0.65619695  |
| O | 0.32859537  | -2.34710713 | 0.62001766  |
| C | 2.74842850  | -1.86642871 | -0.89292228 |
| C | 3.97476906  | -1.58060523 | -1.47162123 |
| C | 4.64626216  | -0.40168518 | -1.12523051 |
| C | 4.09733435  | 0.48673053  | -0.20648407 |
| O | 0.88195610  | 1.73865899  | 2.76607326  |
| C | -0.34286598 | 1.28449273  | -0.80090166 |
| C | -1.32313146 | 2.18504479  | -1.50360052 |
| O | -1.79645716 | 3.15623908  | -0.65684067 |
| C | -1.66877648 | 2.08471688  | -2.78955250 |
| C | -3.16262230 | -0.25196459 | 1.18027280  |
| C | -4.27876938 | -1.07138386 | 1.02118165  |
| C | -4.36464831 | -1.92742168 | -0.07671762 |
| C | -3.32799673 | -1.95433762 | -1.00878514 |
| H | -1.42032507 | -1.17680385 | -1.58201198 |
| H | -1.25686285 | 1.45077746  | 1.12636771  |
| H | -0.32038572 | -0.47491997 | 2.23546394  |
| H | 2.20931598  | -2.77244002 | -1.14116586 |
| H | 4.41284333  | -2.26490524 | -2.18749025 |
| H | 5.60681420  | -0.17485838 | -1.57238407 |

|   |             |             |             |
|---|-------------|-------------|-------------|
| H | 4.61135168  | 1.39520800  | 0.08061457  |
| H | 0.52323938  | 1.89921078  | -0.53037087 |
| H | 0.01278785  | 0.53506462  | -1.50811253 |
| H | -2.42825998 | 3.71916199  | -1.12202128 |
| H | -1.26337520 | 1.29271694  | -3.40370582 |
| H | -2.35624392 | 2.78393496  | -3.25304213 |
| H | -3.10796024 | 0.41603088  | 2.03433638  |
| H | -5.08111430 | -1.03637585 | 1.74965698  |
| H | -5.23246845 | -2.56417479 | -0.20661922 |
| H | -3.38623877 | -2.61420642 | -1.86724017 |

Tautomer **T7S\_E**

Energy (B3LYP/6-311++G(d,p)) = -1034.85084167 hartrees

|   |             |             |             |
|---|-------------|-------------|-------------|
| C | -1.84147930 | -1.54408196 | -1.14549431 |
| C | -2.19831570 | -0.74776937 | -0.05293433 |
| C | -1.32520773 | 0.42126772  | 0.41748186  |
| C | 0.16394272  | 0.07184139  | 0.40314433  |
| C | 1.08882505  | 0.50236267  | -0.51481359 |
| C | 2.47112878  | 0.07133151  | -0.44831233 |
| C | 2.83759591  | -0.78456413 | 0.59558978  |
| O | 1.92485591  | -1.18604521 | 1.52795140  |
| C | 0.59641677  | -0.79208299 | 1.48512279  |
| O | -0.11172180 | -1.21140257 | 2.38212667  |
| C | 4.14338634  | -1.25393990 | 0.72882947  |
| C | 5.09705457  | -0.85748846 | -0.19892931 |
| C | 4.75362501  | 0.00159124  | -1.25241696 |
| C | 3.45287751  | 0.46321772  | -1.37603397 |
| O | 0.81109358  | 1.32800042  | -1.53551762 |
| C | -1.73157872 | 1.68359736  | -0.34251684 |
| C | -1.67068082 | 2.93873291  | 0.14186312  |
| O | -2.14690847 | 4.01597220  | -0.55290338 |
| C | -1.09265696 | 3.36928859  | 1.45117750  |
| C | -3.41505300 | -0.99999691 | 0.59016185  |
| C | -4.25625859 | -2.02281525 | 0.15406626  |
| C | -3.89222318 | -2.81050207 | -0.93851936 |
| C | -2.68194245 | -2.56694873 | -1.58688994 |
| H | -0.89961300 | -1.37425666 | -1.65575576 |
| H | -1.57258613 | 0.57120257  | 1.47087873  |
| H | 4.38886408  | -1.91484849 | 1.55068222  |
| H | 6.11482684  | -1.21696771 | -0.10355587 |
| H | 5.50577219  | 0.30523984  | -1.97023271 |
| H | 3.17573748  | 1.12678367  | -2.18442480 |
| H | -0.08644210 | 1.70014710  | -1.40561103 |
| H | -2.22479913 | 1.53207038  | -1.30112109 |
| H | -2.54786261 | 3.72906125  | -1.38419489 |



|   |             |             |             |
|---|-------------|-------------|-------------|
| H | -0.26403644 | 4.06321612  | 1.28177359  |
| H | -1.85072114 | 3.90184369  | 2.03267456  |
| H | -0.72526478 | 2.52793960  | 2.03481949  |
| H | -3.70541636 | -0.39299228 | 1.44178657  |
| H | -5.19241692 | -2.20636571 | 0.66977217  |
| H | -4.54345088 | -3.60774007 | -1.27870953 |
| H | -2.38788204 | -3.17478020 | -2.43549427 |

Tautomer **T7S\_Z**

Energy (B3LYP/6-311++G(d,p)) = -1034.85257261 hartrees

|   |             |             |             |
|---|-------------|-------------|-------------|
| C | -3.45041989 | -0.97963089 | 0.58116238  |
| C | -2.22517671 | -0.73009544 | -0.04653132 |
| C | -1.34799706 | 0.42386776  | 0.45076595  |
| C | 0.14154305  | 0.07355529  | 0.43505890  |
| C | 1.04975339  | 0.46809299  | -0.51689943 |
| C | 2.43004267  | 0.02991685  | -0.46247774 |
| C | 2.80940271  | -0.79943203 | 0.59836825  |
| O | 1.91111967  | -1.17120167 | 1.55720875  |
| C | 0.58470415  | -0.77312255 | 1.52637876  |
| O | -0.11444023 | -1.17331308 | 2.43887826  |
| C | 4.11450032  | -1.27309157 | 0.72168347  |
| C | 5.05353838  | -0.90903325 | -0.23376445 |
| C | 4.69678660  | -0.07757764 | -1.30489470 |
| C | 3.39705606  | 0.38895106  | -1.41848659 |
| O | 0.75448614  | 1.25813419  | -1.55882702 |
| C | -1.73389524 | 1.71224981  | -0.27347241 |
| C | -1.52555492 | 2.95683758  | 0.19846037  |
| O | -0.85270919 | 3.23165974  | 1.35226986  |
| C | -1.99545736 | 4.21076948  | -0.46711352 |
| C | -1.86190448 | -1.51631061 | -1.14389144 |
| C | -2.70644423 | -2.52636191 | -1.60651926 |
| C | -3.92571364 | -2.76726923 | -0.97432795 |
| C | -4.29532166 | -1.98987072 | 0.12356341  |
| H | -3.74476661 | -0.38092305 | 1.43724765  |
| H | -1.60272594 | 0.54326631  | 1.51027024  |
| H | 4.37062557  | -1.91274834 | 1.55695002  |
| H | 6.07061546  | -1.27245179 | -0.14642287 |
| H | 5.43791278  | 0.20077206  | -2.04404871 |
| H | 3.10936893  | 1.03163461  | -2.23995791 |
| H | -0.13928150 | 1.64161063  | -1.42796498 |
| H | -2.32591145 | 1.62059049  | -1.17682540 |
| H | -0.54280098 | 2.42169623  | 1.77748822  |
| H | -2.67342614 | 4.75426172  | 0.19786070  |
| H | -1.14817679 | 4.86886482  | -0.68033346 |
| H | -2.51615600 | 3.98890247  | -1.39759147 |

|   |             |             |             |
|---|-------------|-------------|-------------|
| H | -0.91333851 | -1.34930783 | -1.64207625 |
| H | -2.40813735 | -3.12645938 | -2.45905741 |
| H | -4.57975363 | -3.55480853 | -1.33121176 |
| H | -5.23835150 | -2.17180390 | 0.62705834  |

Tautomer **T8S**

Energy (B3LYP/6-311++G(d,p)) = -1034.8466979 hartrees

|   |             |             |             |
|---|-------------|-------------|-------------|
| C | -2.33578511 | -1.30347341 | 1.34811915  |
| C | -2.32648414 | -0.48199644 | 0.20824875  |
| C | -1.39333997 | 0.73584871  | 0.19266296  |
| C | 0.07510614  | 0.33843485  | 0.31775877  |
| C | 0.68644875  | -0.58665413 | -0.48884640 |
| C | 2.10317678  | -0.86382434 | -0.38428892 |
| C | 2.82798470  | -0.16408075 | 0.58681412  |
| O | 2.21141540  | 0.72515491  | 1.41919927  |
| C | 0.85518577  | 1.00353141  | 1.34398409  |
| O | 0.42980878  | 1.79190736  | 2.16742815  |
| C | 4.19897866  | -0.35516806 | 0.75007631  |
| C | 4.85242647  | -1.26391509 | -0.07137816 |
| C | 4.14580429  | -1.97982949 | -1.04812639 |
| C | 2.78300121  | -1.78304470 | -1.20339484 |
| O | 0.04946644  | -1.29621053 | -1.43776534 |
| C | -1.62720502 | 1.68742897  | -1.01609028 |
| C | -0.96619947 | 3.02831122  | -0.86571277 |
| O | -1.59306029 | 3.78018221  | 0.09681659  |
| C | 0.07919681  | 3.45639918  | -1.57949299 |
| C | -3.17652056 | -0.81775121 | -0.85288237 |
| C | -4.00551211 | -1.94322400 | -0.78043406 |
| C | -4.00278442 | -2.74496524 | 0.35515019  |
| C | -3.16326616 | -2.41786867 | 1.42380025  |
| H | -1.68814171 | -1.06143043 | 2.18416811  |
| H | -1.62170352 | 1.30983123  | 1.09259948  |
| H | 4.72607775  | 0.20422596  | 1.51276381  |
| H | 5.91800974  | -1.41972017 | 0.04847614  |
| H | 4.66539612  | -2.68811739 | -1.68175541 |
| H | 2.22707762  | -2.32950486 | -1.95364812 |
| H | -0.91449925 | -1.22539124 | -1.34040661 |
| H | -1.28134709 | 1.23054916  | -1.94504139 |
| H | -2.70346271 | 1.86024615  | -1.11339616 |
| H | -1.13136845 | 4.62068745  | 0.20960876  |
| H | 0.52563326  | 2.81827271  | -2.32945844 |
| H | 0.50660559  | 4.44257469  | -1.43276343 |
| H | -3.21351031 | -0.20639871 | -1.74644757 |
| H | -4.65364613 | -2.18181150 | -1.61601106 |
| H | -4.64668997 | -3.61495901 | 0.41294440  |

H -3.15674923 -3.03227835 2.31713333

**Tautomer T9S\_R**

Energy (B3LYP/6-311++G(d,p)) = -1034.85863101 hartrees

|   |             |             |             |
|---|-------------|-------------|-------------|
| C | 3.33685297  | -1.23991493 | -0.85163189 |
| C | 2.10147629  | -0.86697770 | -0.30086617 |
| C | 1.17624139  | 0.05110511  | -1.11174011 |
| C | -0.24393147 | 0.11403986  | -0.60429827 |
| C | -0.67572927 | 1.22860475  | 0.05511494  |
| O | -1.92476376 | 1.40403299  | 0.51809565  |
| C | -2.85878718 | 0.40979208  | 0.33405358  |
| C | -2.53808573 | -0.77058900 | -0.34010610 |
| C | -1.16972419 | -0.96752860 | -0.86543380 |
| O | -0.84751127 | -1.98826604 | -1.48850741 |
| C | -3.54350642 | -1.73900471 | -0.49367680 |
| C | -4.81445845 | -1.52241679 | 0.01276758  |
| C | -5.10646102 | -0.32652276 | 0.68598914  |
| C | -4.13187689 | 0.64719227  | 0.85002308  |
| O | 0.03298740  | 2.31272213  | 0.33643053  |
| C | 1.48298150  | 2.35538985  | -0.01346758 |
| C | 1.71703016  | 1.49263141  | -1.25371920 |
| O | 2.20497905  | 1.94147665  | 1.10806252  |
| C | 1.76925254  | 3.82815533  | -0.22947473 |
| C | 1.76963103  | -1.35058587 | 0.96943553  |
| C | 2.65322919  | -2.16961730 | 1.67864382  |
| C | 3.87873715  | -2.52515472 | 1.12313520  |
| C | 4.21640437  | -2.05878701 | -0.14979412 |
| H | 3.60885443  | -0.89043968 | -1.84252698 |
| H | 1.13680761  | -0.37196852 | -2.11965585 |
| H | -3.29572400 | -2.65464534 | -1.01631859 |
| H | -5.58430892 | -2.27481264 | -0.10893771 |
| H | -6.10047550 | -0.15671354 | 1.08246577  |
| H | -4.33581391 | 1.57740163  | 1.36546455  |
| H | 2.78694617  | 1.49189433  | -1.46763071 |
| H | 1.21465026  | 1.97369727  | -2.09613991 |
| H | 2.28052841  | 0.97621417  | 1.13003482  |
| H | 1.15047728  | 4.22559070  | -1.03409908 |
| H | 2.82105865  | 3.95688122  | -0.48906220 |
| H | 1.56253714  | 4.37983127  | 0.68916820  |
| H | 0.81113461  | -1.09941150 | 1.40941840  |
| H | 2.37426836  | -2.53211943 | 2.66165561  |
| H | 4.56343717  | -3.16299260 | 1.67028384  |
| H | 5.16443495  | -2.33700083 | -0.59649509 |

**Tautomer T9S\_S**

Energy (B3LYP/6-311++G(d,p)) = -1034.85713997 hartrees

|   |             |             |             |
|---|-------------|-------------|-------------|
| C | 3.26548185  | -1.28492885 | -0.90128352 |
| C | 2.23306493  | -0.78535346 | -0.10248017 |
| C | 1.39708261  | 0.39627683  | -0.58970187 |
| C | -0.09045365 | 0.25460995  | -0.32088169 |
| C | -0.78491408 | 1.28609464  | 0.24370227  |
| O | -2.08842393 | 1.25000511  | 0.56552987  |
| C | -2.81362579 | 0.10791975  | 0.31522596  |
| C | -2.23869835 | -0.97926279 | -0.34511242 |
| C | -0.81736757 | -0.92523652 | -0.75328838 |
| O | -0.29626367 | -1.83104688 | -1.41464063 |
| C | -3.04334898 | -2.10315373 | -0.59367322 |
| C | -4.36698585 | -2.12597887 | -0.18597306 |
| C | -4.91605550 | -1.01816959 | 0.47750565  |
| C | -4.14391833 | 0.10611372  | 0.73172504  |
| O | -0.30605792 | 2.48675527  | 0.55135003  |
| C | 0.98337045  | 2.87393893  | -0.07631097 |
| C | 1.93634112  | 1.69204665  | 0.06096086  |
| O | 0.73463679  | 3.24672722  | -1.40201539 |
| C | 1.41800343  | 4.11177970  | 0.67958247  |
| C | 2.03864190  | -1.34116530 | 1.16659914  |
| C | 2.85057559  | -2.37926808 | 1.62114991  |
| C | 3.87702566  | -2.87353905 | 0.81503187  |
| C | 4.08297003  | -2.32097563 | -0.44852919 |
| H | 3.42839497  | -0.86547665 | -1.88910283 |
| H | 1.54457088  | 0.45019801  | -1.67527574 |
| H | -2.59887114 | -2.94719284 | -1.10643375 |
| H | -4.98017232 | -2.99827092 | -0.37756484 |
| H | -5.95185882 | -1.03559987 | 0.79512010  |
| H | -4.54798043 | 0.97352019  | 1.23855869  |
| H | 2.09727615  | 1.52237920  | 1.12788449  |
| H | 2.89917644  | 1.95965440  | -0.37783433 |
| H | 0.67178849  | 2.47070761  | -1.97294788 |
| H | 2.37270748  | 4.46112169  | 0.28434892  |
| H | 0.67302011  | 4.89922202  | 0.55387787  |
| H | 1.52986807  | 3.88969965  | 1.74086210  |
| H | 1.24278309  | -0.96813099 | 1.80290950  |
| H | 2.68105703  | -2.80253622 | 2.60516934  |
| H | 4.50774238  | -3.68164350 | 1.16800356  |
| H | 4.87623057  | -2.69766721 | -1.08485841 |

Tautomer **T10S\_R**

Energy (B3LYP/6-311++G(d,p)) = -1034.87149432 hartrees

|   |            |             |            |
|---|------------|-------------|------------|
| C | 2.08731961 | -0.99246098 | 1.06323563 |
|---|------------|-------------|------------|

|   |             |             |             |
|---|-------------|-------------|-------------|
| C | 2.34854705  | -0.48219640 | -0.21301086 |
| C | 1.24742097  | 0.03349406  | -1.14945722 |
| C | -0.15259206 | -0.36189416 | -0.75024293 |
| C | -1.01831862 | 0.54188993  | -0.19506526 |
| C | -2.37509417 | 0.15908611  | 0.14552619  |
| C | -2.75747164 | -1.16192334 | -0.11953154 |
| O | -1.88834734 | -2.05417316 | -0.68385775 |
| C | -0.58914061 | -1.71060308 | -1.02330616 |
| O | 0.08537498  | -2.58479591 | -1.53542922 |
| C | -4.03996647 | -1.61986141 | 0.17816502  |
| C | -4.95195873 | -0.74238904 | 0.74897470  |
| C | -4.59068130 | 0.58410458  | 1.02303563  |
| C | -3.31330866 | 1.03102669  | 0.72477331  |
| O | -0.71440160 | 1.81890743  | 0.06787213  |
| C | 0.64862491  | 2.33867766  | -0.18387686 |
| C | 1.27608676  | 1.56734778  | -1.34415798 |
| O | 1.37550877  | 2.24623709  | 1.01097740  |
| C | 0.44435471  | 3.81301197  | -0.47706569 |
| C | 3.68047720  | -0.43709524 | -0.65120603 |
| C | 4.71849155  | -0.87603712 | 0.16504025  |
| C | 4.44639349  | -1.37218595 | 1.44226092  |
| C | 3.12894322  | -1.42982084 | 1.88704691  |
| H | 1.06606307  | -1.06151341 | 1.42137704  |
| H | 1.44805461  | -0.41218525 | -2.12771083 |
| H | -4.30019232 | -2.64788710 | -0.04086106 |
| H | -5.95093456 | -1.09081451 | 0.98320081  |
| H | -5.30987564 | 1.26001357  | 1.46917123  |
| H | -3.02060210 | 2.05164072  | 0.93264598  |
| H | 2.29766028  | 1.92546553  | -1.48017903 |
| H | 0.71841957  | 1.81327798  | -2.25100900 |
| H | 1.76006890  | 1.36333216  | 1.10947221  |
| H | -0.01293112 | 4.29742718  | 0.38747648  |
| H | 1.40980252  | 4.28131526  | -0.67431568 |
| H | -0.20185847 | 3.94556198  | -1.34506177 |
| H | 3.90508784  | -0.05955917 | -1.64376902 |
| H | 5.74020396  | -0.83457534 | -0.19556290 |
| H | 5.25442999  | -1.71390661 | 2.07883593  |
| H | 2.90276177  | -1.82002394 | 2.87296097  |

#### Tautomer **T10S\_S**

Energy (B3LYP/6-311++G(d,p)) = -1034.86995111 hartrees

|   |             |             |             |
|---|-------------|-------------|-------------|
| C | 3.72670105  | -0.22336280 | -0.72422400 |
| C | 2.51389110  | -0.19384821 | -0.03037317 |
| C | 1.33605716  | 0.60210749  | -0.58755168 |
| C | -0.00328611 | -0.10465901 | -0.48276400 |

|   |             |             |             |
|---|-------------|-------------|-------------|
| C | -1.12018788 | 0.53194003  | -0.00831586 |
| C | -2.37186989 | -0.17730435 | 0.16546273  |
| C | -2.40955340 | -1.52145151 | -0.22345576 |
| O | -1.32049476 | -2.12325148 | -0.78831269 |
| C | -0.11849744 | -1.45765062 | -0.98441311 |
| O | 0.74566587  | -2.07513587 | -1.57509566 |
| C | -3.56196625 | -2.29048275 | -0.07044844 |
| C | -4.69362183 | -1.70247383 | 0.47865036  |
| C | -4.68058507 | -0.35609604 | 0.86904844  |
| C | -3.53106865 | 0.40157401  | 0.71125229  |
| O | -1.15955170 | 1.82952730  | 0.33217410  |
| C | -0.05193425 | 2.69817025  | -0.10275557 |
| C | 1.25811476  | 1.96121046  | 0.14574012  |
| O | -0.25462739 | 3.03718850  | -1.45058592 |
| C | -0.20730371 | 3.96498090  | 0.71410715  |
| C | 2.43123550  | -0.84516132 | 1.20519077  |
| C | 3.53291170  | -1.51976043 | 1.72892681  |
| C | 4.73924445  | -1.54589000 | 1.02763811  |
| C | 4.83306086  | -0.89328565 | -0.20095760 |
| H | 3.80618200  | 0.27572020  | -1.68474957 |
| H | 1.55479601  | 0.77636527  | -1.64849462 |
| H | -3.55452719 | -3.32667899 | -0.38460317 |
| H | -5.59400678 | -2.29269332 | 0.60157027  |
| H | -5.57023942 | 0.09302724  | 1.29332063  |
| H | -3.50795155 | 1.44167382  | 1.00820763  |
| H | 1.34543757  | 1.79775183  | 1.22221597  |
| H | 2.09032721  | 2.59847878  | -0.15824292 |
| H | 0.04178883  | 2.32605110  | -2.03197650 |
| H | -0.14498282 | 3.74075819  | 1.77922830  |
| H | -1.17475125 | 4.42283526  | 0.50084385  |
| H | 0.58340746  | 4.66822534  | 0.44950827  |
| H | 1.49875595  | -0.83448883 | 1.76004023  |
| H | 3.44904178  | -2.02552360 | 2.68454839  |
| H | 5.59598099  | -2.07128982 | 1.43428502  |
| H | 5.76475265  | -0.90817980 | -0.75568583 |

**SI3: Determination of activation energies.** We calculated the transition states (TS) at the B3LYP/6-311++ G(d,p) level of theory using the self-consistent reaction field theory (SCRF) polarizable continuum model (PCM). We verified the TSs by examining the vibrational frequencies and calculating the intrinsic reaction coordinate (IRC). A TS is characterized by only one imaginary frequency. Table 1 shows the one imaginary frequency for each calculated TS. The movement of the hydrogen in each of the prototropic reactions had a similar frequency of around  $-2100\text{ cm}^{-1}$ , which was visualized in GaussView and corresponds to O-H bond stretching. The vibration mode for ring-chain equilibrium is a combination of several vibrational modes: O-H stretching, H-O-C bending and C=O stretching.

**Table 1.** Tautomeric equilibrium reactions of warfarin, the corresponding tautomerization equilibrium constants and energy barriers in solution.

| Reaction | Equilibrium              | Rule                 | $\text{pK}_T$ | Transition State Energy (au)     | Energy Barrier (kcal/mol) | Frequency            |
|----------|--------------------------|----------------------|---------------|----------------------------------|---------------------------|----------------------|
| A        | T0 $\leftrightarrow$ T1  | prototropic (Rule 6) | 1.04          |                                  | -                         | -                    |
| B        | T0 $\leftrightarrow$ T2  | prototropic (Rule 6) | 9.78          | -1034.744266                     | 60.43                     | -2147.12             |
| C        | T0 $\leftrightarrow$ T3  | prototropic (Rule 6) | 12.62         | -1034.748671                     | 53.78                     | -2181.05             |
| D        | T1 $\leftrightarrow$ T4  | prototropic (Rule 6) | -3.58         | -1034.759637                     | 62.71                     | -2155.26             |
| E        | T1 $\leftrightarrow$ T5  | prototropic (Rule 6) | 6.64          | -1034.747541                     | 61.24                     | -2196.1              |
| F        | T1 $\leftrightarrow$ T6  | prototropic (Rule 6) | 8.65          | -1034.750981                     | 56.34                     | -2187.97             |
| G        | T4 $\leftrightarrow$ T7  | prototropic (Rule 6) | 6.80          | -1034.754283                     | 61.68                     | -2066.03             |
| H        | T4 $\leftrightarrow$ T8  | prototropic (Rule 6) | 9.50          | -1034.756171                     | 56.81                     | -2197                |
| I        | T5 $\leftrightarrow$ T2  | prototropic (Rule 6) | 2.10          |                                  | -                         | -                    |
| J        | T5 $\leftrightarrow$ T7  | prototropic (Rule 6) | -3.42         |                                  | -                         | -                    |
| K        | T6 $\leftrightarrow$ T3  | prototropic (Rule 6) | 2.93          |                                  | -                         | -                    |
| L        | T6 $\leftrightarrow$ T8  | prototropic (Rule 6) | -2.73         |                                  | -                         | -                    |
| M        | T0 $\leftrightarrow$ T4  | prototropic (Rule 7) | -2.54         | -1034.754900 // -<br>1034.759637 | 65.68 // 62.71            | -2135.84 // -2155.26 |
| N        | T2 $\leftrightarrow$ T7  | prototropic (Rule 7) | -5.52         |                                  | -                         | -                    |
| O        | T3 $\leftrightarrow$ T8  | prototropic (Rule 7) | -5.67         |                                  | -                         | -                    |
| P        | T0 $\leftrightarrow$ T9  | ring chain           | 1.47          | -1034.827955                     | 30.23                     | -159.4               |
| Q        | T4 $\leftrightarrow$ T10 | ring chain           | -1.91         | -1034.829285                     | 23.88                     | -186.32              |

Figure 1 shows the reaction **D** from T1 to T4 as a prototropic example and the reaction **Q** from T4 to T10 as a ring-chain example. The other reactions had similar profiles. Reaction **D**, through 161 points on the reaction path, shows the movement of the hydrogen from the hydroxy group (D1) to the keto group (D3) with an energy barrier of 62.71 kcal/mol. Reaction **Q**, starting with the open-chain form

(Q1), shows the movement of the proton from the hydroxyl group of the coumarin moiety to the side-chain keto group (Q2), and at the same time the approach of the side-chain moiety to close the ring and form a new six-membered ring (Q4).

**Figure 1.** Intrinsic reaction coordinates (IRC) for the prototropic tautomerism reaction **D** equivalent to  $T1 \leftrightarrow T4$  (panel **a**) and the ring-chain tautomerism reaction **Q** equivalent to  $T4 \leftrightarrow T10$  (panel **b**). The structures corresponding to the labels  $D_x$  and  $Q_x$  along the IRC are shown in the panels **c** and **d**, respectively. The orange circles in the structures  $D1$  and  $Q1$  indicate where the reactions are taking place.

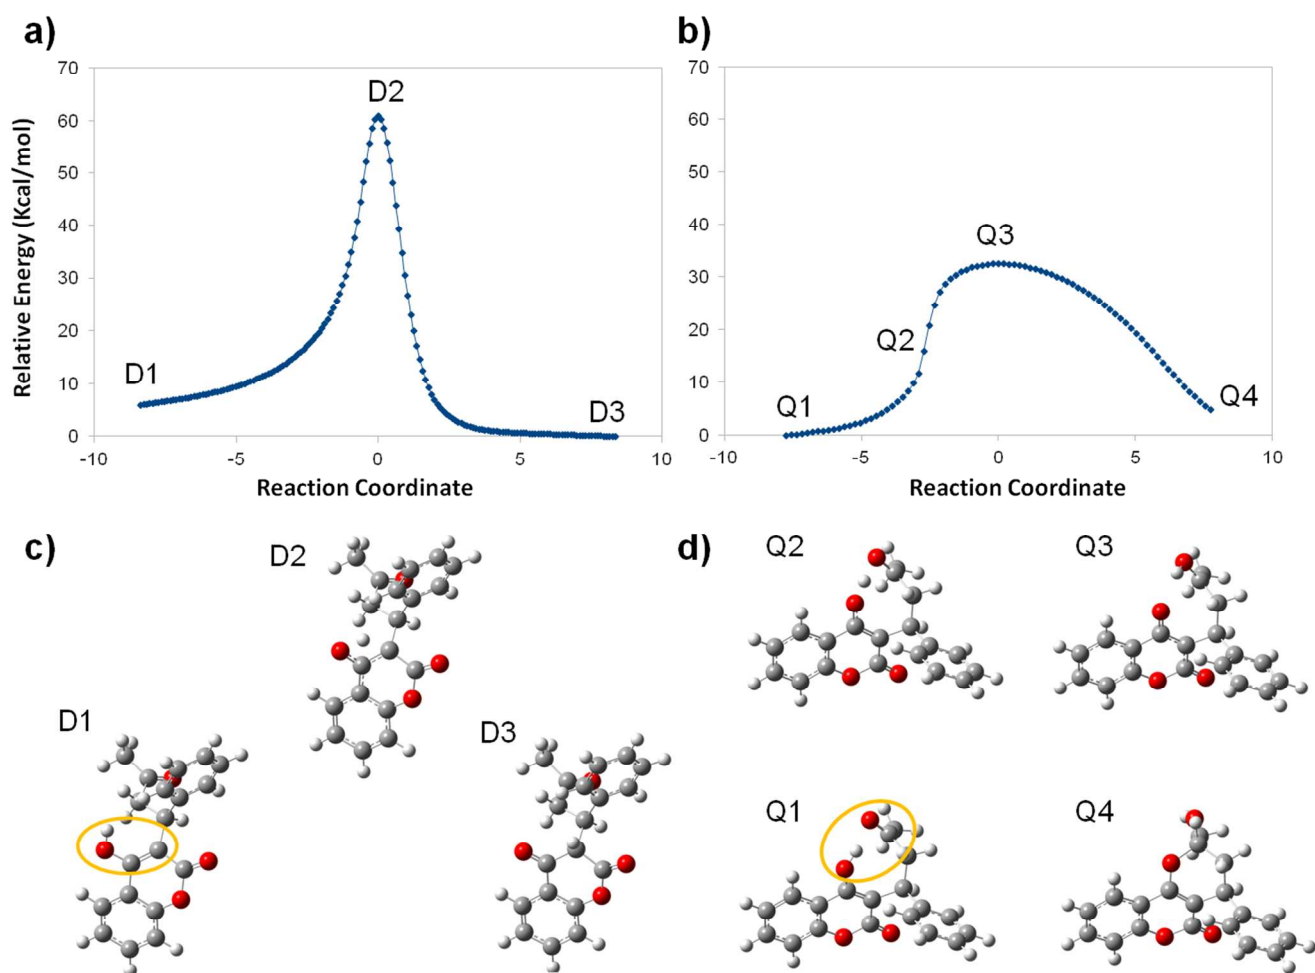



Table 1 shows the transition states and energy barriers for the most favorable equilibria. The order of the TS energies indicates that  $T4 \leftrightarrow T10$  TS is the most energetically favorable transition (-1034.829285 au), whereas  $T0 \leftrightarrow T2$  TS is the least favorable one (-1034.744266 au). The TS involved in ring-chain tautomerism are much lower in energy than the ones involved in prototropic reactions. One TS was obtained for each of the reactions except for the reaction **M**, which corresponds to the equilibrium of  $T0 \leftrightarrow T4$ . Two TS were calculated for  $T0 \leftrightarrow T4$  due to the existence of an intermediate (T1) along the reaction path. This reaction corresponds to the prototropic transformation Rule 7 (1.5 shift) where the hydrogen first moves by one position (1.3 shift), which is the first equilibrium ( $T0 \leftrightarrow T1$ ), and after that does the second movement (1.3 shift), which is the equilibrium ( $T1 \leftrightarrow T4$ ).

At the B3LYP level of theory in solution, the energy barriers for prototropic tautomerization are predicted to be between 53.78-65.68 kcal/mol for the reactions **B**, **C**, **D**, **E**, **F**, **G**, **H** and **M**. In contrast, the barriers for ring-chain tautomerization are predicted to be between 23.88 and 30.23 kcal/mol corresponding to the equilibria **P** and **Q**, respectively. Thus our results suggest that the barrier height for prototropic reactions is much higher than for ring-chain reactions. One would think that the process of opening or closing a ring would be much more energetically expensive than the movement of a proton, however our results show that proton transfer reactions from carbon atoms are intrinsically slow with high energy barriers. It would be interesting to analyze other molecules that have both types of tautomerism, and see if the energy barriers follow the same tendency. The results also suggest that tautomeric energy barriers may be somewhat independent of the overall structure of the tautomers themselves, because the energy barriers for each type of tautomeric reaction were of the same order of magnitude. This opens up the interesting possibility that types of tautomerism could be categorized by the value of their energy barriers.
